# Supplementary material for: Differences in risk factors for self-harm with and without suicidal intent: Findings from the ALSPAC cohort
Source: PubMed Central journal article supplement (PMC4160300; doi:10.1016/j.jad.2014.07.009), 2014-10-15
Supplement: mmc1.pdf [file mmc1.pdf]

**Supplementary Table 1: Associations between exposures and self-harm with and without suicidal intent. A comparison of complete case and multiple imputation analysis**

| Exposure                                                       | Self-harm without suicidal intent versus no self-harm |                     | Self-harm with suicidal intent versus no self-harm |                     | Self-harm with suicidal intent versus self-harm without suicidal intent |                     |
|----------------------------------------------------------------|-------------------------------------------------------|---------------------|----------------------------------------------------|---------------------|-------------------------------------------------------------------------|---------------------|
|                                                                | Complete case                                         | Multiple imputation | Complete case                                      | Multiple imputation | Complete case                                                           | Multiple imputation |
|                                                                | OR [95% CI]                                           | OR [95% CI]         | OR [95% CI]                                        | OR [95% CI]         | OR [95% CI]                                                             | OR [95% CI]         |
| Female gender <sup>a</sup>                                     | 3.28 [2.65, 4.05]                                     | 3.28 [2.65, 4.05]   | 3.68 [2.77, 4.90]                                  | 3.68 [2.77, 4.90]   | 1.12 [0.80, 1.58]                                                       | 1.12 [0.80, 1.58]   |
| Socioeconomic position                                         |                                                       |                     |                                                    |                     |                                                                         |                     |
| <i>Equivalised income (per quintile, 0 [high] -4 [low])</i>    | 1.02 [0.95, 1.09]                                     | 1.01 [0.95, 1.08]   | 1.19 [1.09, 1.30]                                  | 1.21 [1.11, 1.31]   | 1.17 [1.06, 1.30]                                                       | 1.19 [1.07, 1.32]   |
| <i>Parent social class (other vs. professional/managerial)</i> | 0.95 [0.78, 1.16]                                     | 0.95 [0.78, 1.15]   | 1.43 [1.12, 1.82]                                  | 1.44 [1.13, 1.83]   | 1.50 [1.12, 2.01]                                                       | 1.52 [1.14, 2.03]   |
| <i>Mothers education (degree = reference)</i>                  |                                                       |                     |                                                    |                     |                                                                         |                     |
| <i>A level</i>                                                 | 0.69 [0.53, 0.90]                                     | 0.69 [0.53, 0.90]   | 1.50 [1.03, 2.20]                                  | 1.48 [1.01, 2.17]   | 2.17 [1.40, 3.37]                                                       | 2.14 [1.38, 3.32]   |
| <i>O-level</i>                                                 | 0.93 [0.73, 1.18]                                     | 0.92 [0.73, 1.17]   | 1.61 [1.11, 2.33]                                  | 1.59 [1.10, 2.30]   | 1.74 [1.14, 2.63]                                                       | 1.72 [1.14, 2.62]   |
| <i>&lt;O-level</i>                                             | 0.64 [0.48, 0.86]                                     | 0.65 [0.48, 0.86]   | 1.64 [1.10, 2.44]                                  | 1.66 [1.12, 2.47]   | 2.54 [1.59, 4.06]                                                       | 2.57 [1.61, 4.09]   |
| Total IQ (10 point increments)                                 | 1.13 [1.06, 1.21]                                     | 1.14 [1.07, 1.21]   | 0.93 [0.86, 1.01]                                  | 0.92 [0.85, 0.99]   | 0.83 [0.75, 0.91]                                                       | 0.81 [0.74, 0.89]   |
| Childhood sexual abuse                                         | 1.98 [0.71, 5.54]                                     | 2.32 [0.89, 6.01]   | 2.75 [0.90, 8.42]                                  | 3.54 [1.24, 10.1]   | 1.38 [0.37, 5.19]                                                       | 1.53 [0.45, 5.17]   |
| Cruelty to children in household                               | 1.39 [0.84, 2.32]                                     | 1.38 [0.85, 2.24]   | 3.49 [2.16, 5.65]                                  | 3.26 [2.09, 5.09]   | 2.51 [1.34, 4.70]                                                       | 2.36 [1.32, 4.24]   |
| Being Bullied                                                  | 1.51 [1.21, 1.88]                                     | 1.49 [1.19, 1.85]   | 2.33 [1.77, 3.07]                                  | 2.41 [1.85, 3.14]   | 1.55 [1.12, 2.14]                                                       | 1.62 [1.18, 2.22]   |

|                                        |                   |                   |                   |                   |                   |                   |
|----------------------------------------|-------------------|-------------------|-------------------|-------------------|-------------------|-------------------|
| Impulsivity (stop-signal task)         | 1.00 [0.96, 1.04] | 1.00 [0.96, 1.05] | 0.67 [0.92, 1.01] | 0.97 [0.92, 1.01] | 0.96 [0.91, 1.02] | 0.96 [0.91, 1.02] |
| Sensation-seeking (5 point increments) |                   |                   |                   |                   |                   |                   |
| Arnett intensity subscale              | 1.47 [1.32, 1.64] | 1.48 [1.32, 1.65] | 1.54 [1.34, 1.77] | 1.54 [1.33, 1.77] | 1.04 [0.88, 1.23] | 1.04 [0.88, 1.23] |
| Arnett novelty subscale                | 1.42 [1.28, 1.59] | 1.43 [1.28, 1.59] | 1.12 [0.97, 1.28] | 1.13 [0.99, 1.29] | 0.78 [0.67, 0.92] | 0.79 [0.67, 0.93] |
| Body dissatisfaction                   | 1.95 [1.60, 2.38] | 1.92 [1.57, 2.35] | 2.85 [2.21, 3.69] | 2.84 [2.20, 3.66] | 1.46 [1.08, 1.98] | 1.48 [1.09, 1.99] |
| Mental Health                          |                   |                   |                   |                   |                   |                   |
| <i>Depressive symptoms (SMFQ 11+)</i>  | 2.67 [2.04, 3.51] | 2.63 [2.03, 3.40] | 5.08 [3.72, 6.93] | 4.97 [3.70, 6.69] | 1.90 [1.32, 2.72] | 1.89 [1.34, 2.66] |
| <i>DAWAB depression</i>                | 2.73 [1.31, 5.71] | 2.14 [1.06, 4.30] | 9.05 [4.74, 17.3] | 7.47 [4.10, 13.6] | 3.31 [1.53, 7.16] | 3.50 [1.64, 7.43] |
| <i>DAWBAAB anxiety</i>                 | 2.42 [1.20, 4.86] | 2.06 [1.08, 3.92] | 7.37 [3.95, 13.7] | 7.20 [4.07, 12.7] | 3.05 [1.44, 6.46] | 3.50 [1.72, 7.13] |
| Substance use                          |                   |                   |                   |                   |                   |                   |
| <i>Alcohol (heavy drinking)</i>        | 1.98 [1.56, 2.52] | 1.92 [1.52, 2.43] | 1.67 [1.20, 2.32] | 1.71 [1.25, 2.34] | 0.84 [0.58, 1.23] | 0.89 [0.62, 1.28] |
| <i>Cannabis (occasional)</i>           | 3.58 [2.63, 4.86] | 3.21 [2.38, 4.33] | 2.82 [1.85, 4.28] | 2.38 [1.62, 3.51] | 0.79 [0.50, 1.24] | 0.74 [0.48, 1.14] |
| <i>Smoking (weekly)</i>                | 2.09 [1.48, 2.94] | 1.59 [1.17, 2.16] | 4.87 [3.41, 6.96] | 3.51 [2.53, 4.88] | 2.34 [1.52, 3.59] | 2.21 [1.49, 3.29] |
| Self-harm in friends and family        |                   |                   |                   |                   |                   |                   |
| <i>Parent suicide attempt</i>          | 0.82 [0.32, 2.09] | 0.90 [0.36, 2.24] | 4.20 [2.23, 7.92] | 4.24 [2.31, 7.81] | 5.15 [1.83, 14.4] | 4.74 [1.73, 13.0] |
| <i>Mother self-harm (child-rated)</i>  | 3.50 [1.82, 6.72] | 3.41 [1.78, 6.55] | 12.2 [6.95, 21.3] | 11.9 [6.82, 20.9] | 3.48 [1.83, 6.62] | 3.50 [1.84, 6.66] |
| <i>Father self-harm (child-rated)</i>  | 1.51 [0.56, 4.09] | 1.50 [0.55, 4.07] | 4.28 [1.84, 9.98] | 4.26 [1.83, 9.93] | 2.84 [0.92, 8.76] | 2.84 [0.92, 8.75] |
| <i>Friend self-harm (child-rated)</i>  | 5.87 [4.76, 7.24] | 5.86 [4.75, 7.22] | 7.69 [5.75, 10.3] | 7.70 [5.76, 10.3] | 1.31 [0.93, 1.84] | 1.31 [0.93, 1.85] |

<sup>a</sup> Gender contains no missing values

All analyses adjusted for participant gender

SMFQ: short mood and feelings questionnaire

**Supplementary Table 2: Gender-exposure interactions and gender stratified results**

| Gender*Exposure interaction <sup>a</sup>                       | Interaction p-value | Self-harm without suicidal intent versus no self-harm |                   | Self-harm with suicidal intent versus no self-harm |                   |
|----------------------------------------------------------------|---------------------|-------------------------------------------------------|-------------------|----------------------------------------------------|-------------------|
|                                                                |                     | Male                                                  | Female            | Male                                               | Female            |
| Socioeconomic position                                         |                     |                                                       |                   |                                                    |                   |
| <i>Equivalised income (per quintile, 0 [high] -4 [low])</i>    | 0.562               | 0.97 [0.84, 1.11]                                     | 1.04 [0.96, 1.12] | 1.12 [0.93, 1.35]                                  | 1.21 [1.10, 1.34] |
| <i>Parent social class (other vs. professional/managerial)</i> | 0.111               | 0.85 [0.56, 1.29]                                     | 0.99 [0.80, 1.24] | 0.85 [0.48, 1.52]                                  | 1.62 [1.24, 2.13] |
| <i>Mothers education (degree = reference)</i>                  | 0.256               | Reference                                             | Reference         | Reference                                          | Reference         |
| <i>A level</i>                                                 |                     | 0.48 [0.28, 0.80]                                     | 0.79 [0.58, 1.07] | 1.00 [0.47, 2.12]                                  | 1.74 [1.12, 2.72] |
| <i>O-level</i>                                                 |                     | 0.74 [0.47, 1.17]                                     | 1.01 [0.76, 1.34] | 1.36 [0.67, 2.73]                                  | 1.74 [1.13, 2.68] |
| <i>&lt;O-level</i>                                             |                     | 0.41 [0.21, 0.81]                                     | 0.74 [0.53, 1.04] | 0.74 [0.29, 1.91]                                  | 2.00 [1.27, 3.16] |
| Total IQ (10 point increments)                                 | 0.326               | 1.20 [1.05, 1.36]                                     | 1.11 [1.03, 1.19] | 1.01 [0.86, 1.19]                                  | 0.91 [0.82, 1.00] |
| Childhood sexual abuse                                         | -                   | -                                                     | 2.67 [0.89, 8.01] | -                                                  | 3.63 [1.11, 11.9] |
| Cruelty to children in household                               | 0.862               | 1.29 [0.50, 3.31]                                     | 1.42 [0.77, 2.62] | 4.21 [1.79, 9.86]                                  | 3.24 [1.81, 5.79] |
| Being Bullied                                                  | 0.138               | 1.28 [0.80, 2.04]                                     | 1.60 [1.25, 2.07] | 1.42 [0.77, 2.61]                                  | 2.69 [1.97, 3.67] |
| Impulsivity (stop-signal task)                                 | 0.600               | 1.01 [0.93, 1.10]                                     | 1.00 [0.95, 1.05] | 0.93 [0.86, 1.01]                                  | 0.98 [0.93, 1.04] |
| Sensation-seeking (5 point increments)                         |                     |                                                       |                   |                                                    |                   |
| Arnett intensity subscale                                      | 0.700               | 1.45 [1.16, 1.82]                                     | 1.49 [1.31, 1.68] | 1.37 [1.00, 1.86]                                  | 1.58 [1.35, 1.85] |

|                                       |       |                   |                   |                   |                   |
|---------------------------------------|-------|-------------------|-------------------|-------------------|-------------------|
| Arnett novelty subscale               | 0.122 | 1.71 [1.35, 2.18] | 1.35 [1.20, 1.53] | 1.32 [0.96, 1.82] | 1.07 [0.92, 1.24] |
| Body dissatisfaction                  | 0.983 | 1.98 [1.29, 3.06] | 1.95 [1.56, 2.43] | 2.98 [1.72, 5.15] | 2.82 [2.11, 3.77] |
| Mental Health                         |       |                   |                   |                   |                   |
| <i>Depressive symptoms (SMFQ 11+)</i> | 0.160 | 3.90 [2.16, 7.04] | 2.48 [1.83, 3.36] | 3.30 [1.50, 7.27] | 5.48 [3.88, 7.74] |
| <i>DAWAB depression</i>               | -     | -                 | 3.01 [1.40, 6.51] | 15.5 [3.74, 63.9] | 8.28 [4.06, 16.9] |
| <i>DAWBAAB anxiety</i>                | -     | 2.21 [0.27, 18.2] | 2.55 [1.21, 5.38] | -                 | 8.60 [4.45, 16.6] |
| Substance use                         |       |                   |                   |                   |                   |
| <i>Alcohol (heavy drinking)</i>       | 0.139 | 1.84 [1.10, 3.05] | 2.05 [1.56, 2.70] | 0.81 [0.34, 1.94] | 1.97 [1.37, 2.83] |
| <i>Cannabis (occasional)</i>          | 0.124 | 4.91 [2.93, 8.21] | 3.13 [2.14, 4.58] | 1.62 [0.63, 4.22] | 3.20 [1.99, 5.14] |
| <i>Smoking (weekly)</i>               | 0.004 | 2.95 [1.49, 5.83] | 1.97 [1.33, 2.92] | 0.93 [0.22, 3.95] | 6.09 [4.13, 9.00] |
| Self-harm in friends and family       |       |                   |                   |                   |                   |
| <i>Parent suicide attempt</i>         | 0.748 | 0.76 [0.10, 5.70] | 0.81 [0.28, 2.35] | 6.12 [2.02, 18.5] | 3.62 [1.70, 7.72] |
| <i>Mother self-harm (child-rated)</i> | -     | -                 | 4.49 [2.20, 9.15] | 9.31 [2.50, 34.7] | 13.8 [7.25, 26.2] |
| <i>Father self-harm (child-rated)</i> | -     | 2.20 [0.27, 18.0] | 1.44 [0.47, 4.43] | -                 | 5.07 [2.08, 12.3] |
| <i>Friend self-harm (child-rated)</i> | 0.004 | 9.07 [6.07, 13.5] | 4.93 [3.88, 6.28] | 13.2 [7.39, 23.7] | 6.27 [4.52, 8.69] |

SMFQ: short mood and feelings questionnaire

<sup>a</sup> Some models cannot be run for males for as there is one cell with a '0' value
